# Supplementary material
Source: publisher figshare collection journal article supplement (https://springernature.figshare.com/ndownloader/files/17297504)
Supplement: Supplementary file 1 [file 17297504]

## Sheet: Sources
Name	Accessed Via	Queried from
Web Of Science- SCI-Expanded	Bibliographic database*	Web of Science
JSTOR	Bibliographic database*	JSTOR
SpringerLink	Bibliographic database*	SpringerLink
Elsevier Science Direct	Bibliographic database*	Elsevier Science Direct
Wiley Online Library	Bibliographic database*	Wiley Online Library
Academic OneFile	Bibliographic database*	GALE aggregator GUI
Biological Science Index	Bibliographic database*	ProQuest aggregator GUI
eBook Central	Bibliographic database*	ProQuest aggregator GUI
Dissertations and Theses @ IUP	Bibliographic database*	ProQuest aggregator GUI
Dissertations and Theses Global	Bibliographic database*	ProQuest aggregator GUI
Annual Reviews	Bibliographic database*	Annual Reviews
Biological Abstracts	Bibliographic database*	EBSCOhost aggregator GUI
Academic Search Complete	Bibliographic database*	EBSCOhost aggregator GUI
Academic Search Main	Bibliographic database*	EBSCOhost aggregator GUI
ScienceReferenceCenter	Bibliographic database*	EBSCOhost aggregator GUI
Environment Complete	Bibliographic database*	EBSCOhost aggregator GUI
GreenFILE	Bibliographic database*	EBSCOhost aggregator GUI
Agricola	Bibliographic database*	EBSCOhost aggregator GUI
EBSCOeBooks- Academic Collection	Bibliographic database*	EBSCOhost aggregator GUI
Scopus	Bibliographic database**	Scopus
CABI (CAB abstracts and Cab Abstracts Archive)	Bibliographic database**	CAB Abstracts
EBSCO open dissertations	Bibliographic database*	EBSCOhost aggregator GUI
Microsoft Academic	Searchable web database	Publish or Perish software
Google Scholar	Searchable web database	Publish or Perish software
US Forest Service Treesearch	Searchable web database	http://www.treesearch.fs.fed.us/
US Geological Survey Publications Warehouse	Searchable web database	https://pubs.er.usgs.gov/
National Technical Reports Library	Searchable web database	https://ntrl.ntis.gov/NTRL/
Canadian Forest Service	Searchable web database	http://cfs.nrcan.gc.ca/publications
Partners in Flight	Organizational Website	https://www.partnersinflight.org/
Appalachians Large Conservation Cooperative (LCC)	Organizational Website	https://applcc.org/
North Atlantic LCC	Organizational Website	https://northatlanticlcc.org/
Gulf Coastal Plains and Ozarks LCC	Organizational Website	https://gcpolcc.org/
South Atlantic LCC	Organizational Website	https://www.southatlanticlcc.org/
Atlantic Coast Joint Venture (JV)	Organizational Website	http://acjv.org/
Appalachian Mountains JV	Organizational Website	https://amjv.org/
Upper Mississippi River/Great Lakes JV	Organizational Website	http://www.uppermissgreatlakesjv.org/
Central Hardwoods JV	Organizational Website	https://www.chjv.org/
East Gulf Coastal Plain JV	Organizational Website	http://www.egcpjv.org/
Lower Mississippi Valley JV	Organizational Website	http://www.lmvjv.org/
Eastern Habitat JV Canada	Organizational Website	http://www.ehjv.ca/
Boreal songbird initiative	Organizational Website	https://www.borealbirds.org/
Boreal avian modelling project	Organizational Website	http://www.borealbirds.ca/
NCASI (National Council on Air and Stream Improvement)	Organizational Website	http://www.ncasi.org
Government of Canada Publications	Organizational Website	http://publications.gc.ca/site/eng/home.html
Wildlife Conservation Society	Organizational Website	https://northamerica.wcs.org/About-Us/Publications.aspx
American Ornithologists Union Checklist	Organizational Website	http://checklist.aou.org/
The Nature Conservancy	Organizational Website	https://www.conservationgateway.org/ConservationPlanning/ToolsData/sitepages/article-list.aspx
American Bird Conservancy	Organizational Website	https://abcbirds.org/results/publications/
SORA- Searchable Ornithology Research Archive	Organizational Website	https://sora.unm.edu/
Natureserve	Organizational Website	http://www.natureserve.org/biodiversity-science/publications
Birds of North America Online	Reference Series***	https://birdsna.org/Species-Account/bna/home
*Accessed through Indiana University of Pennsylvania Library
**Accessed via the University of Massachussetts Amherst Library
***Used to check comprehensiveness of search, not to access primary literature
